# Supplementary material for: PyRates—A Python framework for rate-based neural simulations
Source: PubMed Central journal article supplement (PMC6913930; doi:10.1371/journal.pone.0225900), 2019-12-16
Supplement: pone.0225900.s002.pdf [file pone.0225900.s002.pdf]

**Table S2. Overview of preimplemented mathematical functions.**

| Syntax        | Description                                                                        | Syntax         | Description                                                 |
|---------------|------------------------------------------------------------------------------------|----------------|-------------------------------------------------------------|
| sin(a)        | sine                                                                               | reshape(a, b)  | reorder content of a to shape b (may be a tuple)            |
| cos(a)        | cosine                                                                             | dtype(a)       | output data type of a                                       |
| tan(a)        | tangent                                                                            | squeeze(a)     | removes singleton dimensions of array a                     |
| abs(a)        | absolute value                                                                     | cast(a, dtype) | Casts array a into new data type dtype                      |
| sqrt(a)       | square root                                                                        | randn(a, b, c) | draw c numbers, randomly distributed between a and b        |
| sq(a)         | square $a^2$                                                                       | ones(a)        | initialize an array of shape a filled with ones             |
| exp(a)        | exponential $e^x$                                                                  | zeros(a)       | initialize an array of shape a filled with zeroes           |
| max(a)        | maximum                                                                            | sum(a)         | sum over all elements in a                                  |
| min(a)        | minimum                                                                            | concat(a, b)   | concatenate two arrays                                      |
| argmax(a)     | arguments of the maxima                                                            | sigmoid(a)     | sigmoid function $\frac{1}{1+e^{-a}}$                       |
| softmax(a)    | rescales element of vector a to values between 0 and 1, using the softmax function | range(a, b, c) | create array with integer numbers between a and b of step c |
| argmin(a)     | arguments of the minima                                                            | tanh           | hyperbolic tangent                                          |
| round(a)      | round to nearest integer                                                           | mask(a, b)     | apply boolean mask b to array a                             |
| roundto(a, b) | round to $\backslash\textit{b}$ number of digits                                   |                |                                                             |

Mathematical functions are mapped to functions provided by the tensorflow that are named similarly. Additional functions supported by tensorflow may be defined in the frontend. For more information on these functions, please refer to the tensorflow API documentation [20].
